# Supplementary material
Source: publisher figshare collection journal article supplement (https://gsajournals.figshare.com/ndownloader/files/27953673)
Supplement: Supplementary file 1 [file 27953673]

Supplemental Table 1. List of *Candida albicans* strains.

| Strain | Genotype | Reference |
| --- | --- | --- |
| CW542 | *arg4Δhis1Δ leu2Δ::C.m. LEU2::C.d. ARG4 ura3Δ iro1Δ::λimm434*  *arg4Δ his1Δ leu2Δ::C.d. HIS1 URA3::hisG IRO1* | This study |
| CW696 | *ura3Δ iro1Δ::pHIS1 IRO1::λimm434 ARG4:URA3:arg4::hisG his1::hisG*  *ura3Δ iro1Δ::λimm434 arg4::hisG his1::hisG* | [1] |
| CW1697 | *arg4Δhis1Δ leu2Δ ura3Δ iro1Δ::λimm434 orf19.851::C.d. ARG4 pga28::C.d. HIS1 orf19.3499::C.m. LEU2*  *arg4Δhis1Δ leu2ΔURA3::hisG IRO1 orf19.851:: C.d. ARG4 pga28::C.d. HIS1 orf19.3499::C.m. LEU2* | This study |
| CW1757 | *arg4Δ his1Δ leu2Δ::C.m. LEU2::C.d. ARG4 ura3Δ iro1Δ::λimm434*  *arg4Δ his1Δ leu2Δ::C.d. HIS1 URA3::hisG IRO1* | This study |
| CW1779 | *arg4Δ his1Δ leu2Δ::C.d. HIS1 ura3Δ iro1Δ::λimm434 efg1Δ::NAT natΔ::EFG1 ARG4*  *arg4Δ his1Δ leu2Δ::C.m. LEU2 URA3::hisG IRO1 efg1Δ::NAT natΔ::EFG1 ARG4* | This study |
| CW1785 | *arg4Δhis1Δ leu2 ura3Δ iro1Δ::λimm434 cup9::C.d. HIS1 efg1Δ::NAT natΔ::EFG1 ARG4*  *arg4Δhis1Δ leu2Δ URA3::hisG IRO1 cup9::C.m. LEU2 efg1Δ::NAT natΔ::EFG1 ARG4* | This study |
| CW1792 | *arg4Δhis1Δ leu2Δ::C.d. HIS1ura3Δ iro1Δ::λimm434 efg1Δ::NAT ARG4*  *arg4Δhis1Δ leu2Δ::C.m. LEU2URA3::hisG IRO1 efg1Δ::NAT ARG4* | This study |
| CW1796 | *arg4Δhis1Δ leu2Δ ura3Δ iro1Δ::λimm434 cup9::C.d. HIS1 efg1Δ::NAT ARG4*  *arg4Δhis1Δ leu2ΔURA3::hisG IRO1cup9::C.m. LEU2 efg1Δ::NAT ARG4* | This study |
| JJH113 | *ura3::λimm434 arg4::hisG his1::hisG::pHIS1 cbk1::Tn7-UAU1*  *ura3::λimm434 arg4::hisG his1::hisG cbk1::Tn7-URA3* | [2] |
| JJH256 | *ura3::λimm434 arg4::hisG his1::hisG::pHIS1 bck1::Tn7-UAU1*  *ura3::λimm434 arg4::hisG his1::hisG bck1::Tn7-URA3* | [2] |
| JJH262 | *ura3::λimm434 arg4::hisG his1::hisG::pHIS1 cla4::Tn7-UAU1*  *ura3::λimm434 arg4::hisG his1::hisG cla4::Tn7-URA3* | [2] |
| JJH266 | *ura3::λimm434 arg4::hisG his1::hisG::pHIS1 ckb1::Tn7-UAU1*  *ura3::λimm434 arg4::hisG his1::hisG ckb1::Tn7-URA3* | [2] |
| JJH314 | *ura3::λimm434 arg4::hisG his1::hisG::pHIS1 yck3::Tn7-UAU1*  *ura3::λimm434 arg4::hisG his1::hisG yck3::Tn7-URA3* | [2] |
| JJH351 | *ura3::λimm434 arg4::hisG his1::hisG::pHIS1 ckb2::Tn7-UAU1*  *ura3::λimm434 arg4::hisG his1::hisG ckb2::Tn7-URA3* | [2] |
| JJH358 | *ura3::λimm434 arg4::hisG his1::hisG::pHIS1 yck2::Tn7-UAU1*  *ura3::λimm434 arg4::hisG his1::hisG yck2::Tn7-URA3* | [2] |
| JJH377 | *ura3::λimm434 arg4::hisG his1::hisG::pHIS1 hsl1::Tn7-UAU1*  *ura3::λimm434 arg4::hisG his1::hisG hsl1::Tn7-URA3* | [2] |
| JJH381 | *ura3::λimm434 arg4::hisG his1::hisG::pHIS1 kin3::Tn7-UAU1*  *ura3::λimm434 arg4::hisG his1::his kin3::Tn7-URA3* | [2] |
| JJH384 | *ura3::λimm434 arg4::hisG his1::hisG::pHIS1 tpk1::Tn7-UAU1*  *ura3::λimm434 arg4::hisG his1::hisG tpk1::Tn7-URA3* | [2] |
| JJH392 | *ura3::λimm434 arg4::hisG his1::hisG::pHIS1 hst7::Tn7-UAU1*  *ura3::λimm434 arg4::hisG his1::hisG hst7::Tn7-URA3* | [2] |
| JJH433 | *ura3::λimm434 arg4::hisG his1::hisG::pHIS1 mss2::Tn7-UAU1*  *ura3::λimm434 arg4::hisG his1::hisG mss2::Tn7-URA3* | [2] |
| JJH437 | *ura3::λimm434 arg4::hisG his1::hisG::pHIS1 swe1::Tn7-UAU1*  *ura3::λimm434 arg4::hisG his1::hisG swe1::Tn7-URA3* | [2] |
| JJH441 | *ura3::λimm434 arg4::hisG his1::hisG::pHIS1 vps34::Tn7-UAU1*  *ura3::λimm434 arg4::hisG his1::hisG vps34::Tn7-URA3* | [2] |
| JJH443 | *ura3::λimm434 arg4::hisG his1::hisG::pHIS1 rio2::Tn7-UAU1*  *ura3::λimm434 arg4::hisG his1::hisG rio2::Tn7-URA3* | [2] |
| JJH445 | *ura3::λimm434 arg4::hisG his1::hisG::pHIS1 mkk2::Tn7-UAU1*  *ura3::λimm434 arg4::hisG his1::hisG mkk2::Tn7-URA3* | [2] |
| JJH447 | *ura3::λimm434 arg4::hisG his1::hisG::pHIS1 mkc1::Tn7-UAU1*  *ura3::λimm434 arg4::hisG his1::hisG mkc1::Tn7-URA3* | [2] |
| JJH454 | *ura3::λimm434 arg4::hisG his1::hisG::pHIS1 pkc1::Tn7-UAU1*  *ura3::λimm434 arg4::hisG his1::hisG pkc1::Tn7-URA3* | [2] |
| JJH471 | *ura3::λimm434 arg4::hisG his1::hisG::pHIS1 kis1::Tn7-UAU1*  *ura3::λimm434 arg4::hisG his1::hisG kis1::Tn7-URA3* | [2] |
| JJH472 | *ura3::λimm434 arg4::hisG his1::hisG::pHIS1 sip3::Tn7-UAU1*  *ura3::λimm434 arg4::hisG his1::hisG sip3::Tn7-URA3* | [2] |
| JJH473 | *ura3::λimm434 arg4::hisG his1::hisG::pHIS1 prk1::Tn7-UAU1*  *ura3::λimm434 arg4::hisG his1::hisG prk1::Tn7-URA3* | [2] |
| JMR104 | *ura3::λimm434 arg4::hisG his1::hisG::pHIS1 sko1::ARG4*  *ura3::λimm434 arg4::hisG his1::hisG sko1::URA3* | [3] |
| JMR188 | *ura3::λimm434 arg4::hisG his1::hisG::pHIS1 psk1::ARG4*  *ura3::λimm434 arg4::hisG his1::hisG psk1::URA3* | [3] |
| SC5314 | Wild type | [4] |
| SF008P | *ura3::λimm434 arg4::hisG his1::hisG::pHIS1 ire1::Tn7-UAU1*  *ura3::λimm434 arg4::hisG his1::hisG ire1::Tn7-URA3* | [2] |
| SN152 | *arg4Δ his1Δ leu2Δ::C.d. ura3Δ iro1Δ::λimm434*  *arg4Δ his1Δ leu2Δ::C.m. URA3::hisG IRO1* | [5] |
| SN250 | *arg4Δ his1Δ leu2Δ::C.d. HIS1  ura3Δ iro1Δ::λimm434*  *arg4Δ his1Δ leu2Δ::C.m. LEU2URA3::hisG IRO1* | [5] |
| VIC1147 | *ura3::λimm434 arg4::hisG his1::hisG::pHIS1 cas5::ARG4*  *ura3::λimm434 arg4::hisG his1::hisG cas5::URA3* | [6] |
| VIC1194 | *ura3::λimm434 arg4::hisG his1::hisG::pHIS1 ada2::ARG4*  *ura3::λimm434 arg4::hisG his1::hisG ada2::URA3* | [6] |
| VIC1206 | *ura3::λimm434 arg4::hisG his1::hisG::pHIS1 rlm1::ARG4*  *ura3::λimm434 arg4::hisG his1::hisG rlm1::URA3* | [6] |
| YI192 | *arg4Δ his1Δ leu2Δ::C.d. ARG4 ura3Δ iro1Δ::λimm434cup9::C.d. HIS1*  *arg4Δ his1Δ leu2Δ URA3::hisG IRO1 cup9::C.m. LEU2* | This study |
| YI243 | *arg4Δ his1Δ leu2Δ ura3Δ iro1Δ::λimm434 cup9::pCUP9-C.d. ARG4-C.m. LEU2*  *arg4Δ his1Δ leu2Δ URA3::hisG IRO1  cup9::C.d. HIS1 * | This study |
| YI459 | *arg4Δ his1Δ leu2Δ::C.d. HIS1ura3Δ iro1Δ::λimm434 orf19.851:: C.d. ARG4*  *arg4Δ his1Δ leu2Δ::C.m. LEU2 URA3::hisG IRO1 orf19.851:: C.d. ARG4* | This study |
| YI463 | *arg4Δ his1Δ leu2Δ::C.d. HIS1ura3Δ iro1Δ::λimm434 orf19.3499:: C.d. ARG4*  *arg4Δ his1Δ leu2Δ::C.m. LEU2 URA3::hisG IRO1 orf19.3499:: C.d. ARG4* | This study |
| YI464 | *arg4Δ his1Δ leu2Δ::C.d. HIS1ura3Δ iro1Δ::λimm434 pga28:: C.d. ARG4*  *arg4Δ his1Δ leu2Δ::C.m. LEU2 URA3::hisG IRO1 pga28:: C.d. ARG4* | This study |

References:

1. Xu W, Solis NV, Ehrlich RL, Woolford CA, Filler SG, Mitchell AP (2015) Activation and alliance of regulatory pathways in C. albicans during mammalian infection. PLoS Biol. 13: e1002076

2. Blankenship JR, Fanning S, Hamaker JJ, Mitchell AP (2010) An extensive circuitry for cell wall regulation in Candida

albicans. PLoS Pathog. 6: e1000752.

3. Rauceo JM, Blankenship JR, Fanning S, Hamaker JJ, Deneault JS, Smith FJ, Nantel A, Mitchell AP (2008) Regulation

of the Candida albicans cell wall damage response by transcription factor Sko1 and PAS kinase Psk1. Mol Biol Cell. Jul; 19: 2741–2751.

4. Gillum AM, Tsay EY, Kirsch DR (1984) Isolation of the Candida albicans gene for orotidine-5'-phosphate decarboxylase by complementation of S. cerevisiae ura3 and E. coli pyrF mutations. Mol Gen Genet 198: 179-182.

5. Noble SM, French S, Kohn LA, Chen V, Johnson AD (2010) Systematic screens of a Candida albicans homozygous deletion library decouple morphogenetic switching and pathogenicity. Nat Genet. 42: 590-8.

6. Bruno VM, Kalachikov S, Subaran R, Nobile CJ, Kyratsous C, Mitchell AP (2006) Control of the C. albicans cell wall damage response by transcriptional regulator Cas5. PLoS Pathog. 2:e21.
